# Supplementary material
Source: HighWire-hosted journal article supplement (https://jnm.snmjournals.org/highwire/filestream/94870/field_highwire_adjunct_files/0/163717_Supplemental_Data.pdf)
Supplement: 163717_Supplemental_Data.pdf [file 163717_Supplemental_Data.pdf]

**Supplemental Table 1** Visual analyses of 11C-PiB-PET

|                                        | AD positive<br>Rater 1/ Rater 2/ Consensus | AD negative<br>Rater 1/ Rater 2/ Consensus |
|----------------------------------------|--------------------------------------------|--------------------------------------------|
| Conversion to<br>dementia due to AD    | 9 / 9 / 9                                  | 0 / 0 / 0                                  |
| No conversion to<br>dementia due to AD | 9 / 7 / 9                                  | 10 / 12 / 10                               |

AD: Alzheimer's disease; AD: Alzheimer's disease; FDG: Fluor-desoxy-glucose; PiB:  
Pittsburgh-Compound B; PET: Positron Emission Tomography

**Supplemental Table 2** Visual analyses of 18F-FDG-PET

|                                           | Typical of AD<br>Rater 1/ Rater<br>2 | Questionable<br>of AD<br>Rater 1/ Rater<br>2 | Not typical of<br>AD<br>Rater 1/ Rater 2 | Other<br>neurodegeneration<br>Rater 1/ Rater 2 |
|-------------------------------------------|--------------------------------------|----------------------------------------------|------------------------------------------|------------------------------------------------|
| Conversion to<br>dementia due to<br>AD    | 1 / 5                                | 0 / 1                                        | 2 / 1                                    | 6 / 2                                          |
| No conversion<br>to dementia due<br>to AD | 4 / 5                                | 5 / 3                                        | 4 / 7                                    | 6 / 4                                          |

AD: Alzheimer's disease; AD: Alzheimer's disease; FDG: Fluor-desoxy-glucose; PiB:  
Pittsburgh-Compound B; PET: Positron Emission Tomography

**Supplemental Table 3** Fully-automated analyses of 11C-PiB-PET

|                                     | AD positive | AD negative |
|-------------------------------------|-------------|-------------|
| Conversion to dementia due to AD    | 9           | 0           |
| No conversion to dementia due to AD | 8           | 11          |

AD: Alzheimer's disease; FDG: Fluor-desoxy-glucose; PiB: Pittsburgh-Compound B;

PET: Positron Emission Tomography

**Supplemental Table 4** Fully-automated analyses of 18F-FDG-PET

|                                     | Typical of AD | Not typical of AD |
|-------------------------------------|---------------|-------------------|
| Conversion to dementia due to AD    | 7             | 2                 |
| No conversion to dementia due to AD | 12            | 7                 |

AD: Alzheimer's disease; FDG: Fluor-desoxy-glucose; PiB: Pittsburgh-Compound B;

PET: Positron Emission Tomography

**Supplemental Table 5** Dementia of any cause: visual rating of 18F-FDG-PET

| Rater 1 / 2               | typical of neurodegeneration | Not typical of neurodegeneration |
|---------------------------|------------------------------|----------------------------------|
| Conversion to dementia    | 10 / 9                       | 2 / 3                            |
| No conversion to dementia | 7 / 7                        | 9 / 9                            |

FDG: Fluor-desoxy-glucose; PET: Positron Emission Tomography
